1 **Differential inclusion of *NEB* exons 143 and 144 provides insight into *NEB*-related**  
2 **myopathy variant interpretation and disease manifestation**

3  
4 Sarah Silverstein<sup>1,2,3</sup>, Rotem Orbach<sup>1#</sup>, Safoora Syeda<sup>1#</sup>, A Reghan Foley<sup>1</sup>, Svetlana  
5 Gorokhova<sup>4,5</sup>, Katherine G. Meilleur<sup>1,6</sup>, Meganne E. Leach<sup>1,7</sup>, Prech Uapinyoying<sup>1,8</sup>, Katherine R  
6 Chao<sup>9</sup>, Sandra Donkervoort<sup>1</sup>, Carsten G. Bönnemann<sup>1\*</sup>

7  
8 **Abstract (250 words)**

9 Biallelic pathogenic variants in the gene encoding nebulin (*NEB*) are a known cause of  
10 congenital myopathy. We present two individuals with congenital myopathy and compound  
11 heterozygous variants (NM\_001271208.2: c.2079C>A; p.(Cys693Ter) and c.21522+3A>G ) in  
12 *NEB*. Transcriptomic sequencing on patient muscle revealed that the extended splice variant  
13 c.21522+3A>G causes exon 144 skipping. Nebulin isoforms containing exon 144 are known to  
14 be mutually exclusive with isoforms containing exon 143, and these isoforms are differentially  
15 expressed during development and in adult skeletal muscles. Patients MRIs were compared to  
16 the known pattern of relative abundance of these two isoforms in muscle. We propose that the

---

<sup>1</sup> Neuromuscular and Neurogenetic Disorders of Childhood Section, National Institute of Neurological Disorders and Stroke, National Institutes of Health, Bethesda, Maryland 20892, USA

<sup>2</sup> Rutgers New Jersey School of Medicine, 185 S Orange Ave Newark NJ 07103 USA

<sup>3</sup> Undiagnosed Diseases Program, National Human Genome Research Institute, National Institute of Health, Bethesda, Maryland 20892, USA

<sup>4</sup> Aix Marseille Univ, INSERM, MMG, U 1251, Marseille, France

<sup>5</sup> Department of Medical Genetics, Timone Children's Hospital, APHM, Marseille, France

<sup>6</sup> Biogen, Boston MA

<sup>7</sup> Division of Neurology, Oregon Health and Science University, 3181 SW Sam Jackson Park Rd, Portland, OR

<sup>8</sup> Research Center for Genetic Medicine, Children's National Research Institute, Children's National Medical Center, Washington DC 20010

<sup>9</sup> Broad Institute of MIT and Harvard, 415 Main St. Cambridge MA 02142

# These authors contributed equally to this work

\* Corresponding author: [carsten.bonnemann@nih.gov](mailto:carsten.bonnemann@nih.gov)

17 pattern of muscle involvement in these patients better fits the distribution of exon 144-containing  
18 isoforms in muscle than with previously published MRI findings in *NEB*-related disease due to  
19 other variants. To our knowledge this is the first report hypothesizing disease pathogenesis  
20 through the alteration of isoform distributions in muscle.

21

## 22 **Introduction**

23 Nemaline myopathies are a clinically heterogenous group of skeletal muscle diseases  
24 ranging from severe congenital-onset disease to milder childhood-onset disease. Biallelic  
25 pathogenic variants in *NEB* (OMIM 161650), a gene encoding nebulin, are a known cause for  
26 nemaline myopathy (OMIM 256030), belonging to a histologically defined subgroup of  
27 congenital myopathies (Lehtokari et al., 2014). Nebulin is a giant protein (600-900 kDa) that is  
28 an important part of the sarcomeric thin filament and is involved in muscle contraction,  
29 sarcomere maintenance and homeostasis, although the precise mechanisms of its various  
30 functions are still under investigation (Yuen & Ottenheijm, 2020). Nemaline myopathy usually  
31 presents congenitally with axial and proximal muscle weakness, prominent facial and bulbar  
32 weakness, and respiratory muscle weakness (Lehtokari et al., 2014). Milder phenotypes of  
33 nemaline myopathy with onset during childhood or adulthood presenting with distal muscle  
34 weakness have also been reported (Lehtokari et al., 2014; Sewry et al., 2019; Wallgren-  
35 Pettersson & Laing, 2000). Pathogenic *NEB* variants are a major cause of nemaline myopathy,  
36 however, given *NEB*'s 183 exon expanse, and the complexity of its resulting isoforms, the  
37 identification of variants is challenging, and the functional impact of *NEB* variants is difficult to  
38 interpret.

39           Alternative splicing creates diversity of function from an otherwise limited number of  
40 genes. Differential splicing programs are well-established within skeletal muscle for various  
41 developmental states and between type I and type II myofibers; perturbations to these alternative  
42 isoform programs are known to drive muscle disease (Nakka et al., 2018, Trapnell et al., 2010,  
43 Matyushenko et al., 2020; Nikonova et al., 2020; Robaszkiewicz et al., 2020). Moreover,  
44 alternative splicing characteristics between mature muscles that are not associated with fiber type  
45 composition or development have recently been explored for titin encoding gene (*TTN*), although  
46 disruptions in the relative abundance of these isoforms have not yet been linked to disease  
47 (Freiburg et al., 2000; Nikonova et al., 2020; Savarese et al., 2018). .

48           *NEB* (NM\_001271208.2) is a complex transcriptional unit and is known to include  
49 alternatively spliced exons (143 and 144) that are mutually exclusive. Exon 143 is thought to be  
50 prominently expressed in the fetal period, while exon 144 is shown to be expressed with  
51 increasing age in both mice and humans (Donner et al., 2004, 2006; Laitila et al., 2012; Lam et  
52 al., 2018; Uapinyoying et al., 2020). While certain adult muscles ultimately express an equal  
53 ratio of both exons (e.g., vastus intermedius and medialis) others express higher amounts of exon  
54 143 compared to exon 144 (e.g. tibialis anterior), and some adult muscles exclusively express  
55 exon 144 (e.g. gastrocnemius, rectus femoris) (Laitila et al., 2012). As such, a role for the  
56 specific isoforms in myogenesis and fiber typing is postulated (Lehtokari et al., 2014), however  
57 the impact on disease mechanism and disease manifestation in humans has not yet been  
58 explored.

59           RNA sequencing has emerged as a promising tool for understanding the impact of  
60 specific variants on transcription and splice regulation, thus aiding in assessing pathogenicity.  
61 Here we report detailed phenotypic data on two siblings affected with congenital onset muscle

62 weakness in whom we identified compound heterozygous pathogenic variants in *NEB*  
63 (NM\_001271208.2: c.2079C>A; p.(Cys693Ter) and c.21522+3A>G). Aberrant splicing of the  
64 *NEB* intronic variant was confirmed by muscle RNA sequencing. We also explore how the  
65 differential expression of *NEB* isoforms may be linked to muscle function in normal and diseased  
66 muscle. Further, we propose that differential isoform expression across muscle groups may  
67 explain disease-specific patterns of muscle involvement in skeletal muscle disease.

68

## 69 **Subjects and Methods:**

### 70 *Patient recruitment and sample collection*

71 Patients were referred by their neurologist or geneticist. Written informed consent and  
72 age-appropriate assent for study procedures were obtained by a qualified investigator (protocol  
73 12-N-0095 approved by the National Institute of Neurological Disorders and Stroke, National  
74 Institutes of Health Institutional Review Board (IRB)). Medical history was obtained and clinical  
75 evaluations, including muscle magnetic resonance imaging (MRI) and muscle biopsy, were  
76 performed as part of the standard diagnostic evaluation. Blood samples for research-based testing  
77 were obtained using standard procedures.

78

### 79 *Genetic testing*

80 Quartet exome sequencing was performed on DNA isolated from whole blood. Exome  
81 sequencing and data processing were performed by the Genomics Platform at the Broad Institute  
82 of MIT and Harvard with an Illumina exome capture (38 Mb target) and sequenced (150 bp  
83 paired reads) to cover >90% of targets at 20x and a mean target coverage of >100x. Exome  
84 sequencing data was processed through a pipeline based on Picard and mapping done using the

85 BWA aligner to the human genome build 38. Variants were called using Genome Analysis  
86 Toolkit (GATK, HaplotypeCaller package version 3.4).

87

88 Human whole transcriptome sequencing was performed by the GenomicsPlatform at the  
89 Broad Institute of MIT and Harvard on RNA isolated from patient 1 muscle (biopsy taken in  
90 early childhood from biceps muscle). The transcriptome product combines poly(A)-selection of  
91 mRNA transcripts with a strand-specific cDNA library preparation, with a mean insert size of  
92 550 bp. Libraries were sequenced on the HiSeq 2500 platform to a minimum depth of 50 million  
93 reads. ERCC RNA controls were included for all samples, allowing additional control of  
94 variability between samples. Raw sequencing data was aligned using the GTEX pipeline version  
95 10 (<https://github.com/broadinstitute/gtex-pipeline/tree/master/rnaseq>).

96 Confirmation of variants discovered in patients and segregation testing in the parents and  
97 unaffected sibling was performed by Sanger sequencing.

98

### 99 *Splice Variant Analysis*

100 Patient 1 BAM file was analyzed using the Integrative Genomics Viewer (IGV)  
101 (Thorvaldsdottir et al., 2013). Considering the known variability of exon 143 versus 144  
102 inclusions depending on age and muscle biopsy site, we carefully searched for appropriate  
103 controls for Patient 1. Unfortunately, controls matching both age and biopsy site were  
104 unavailable. We could not use the GTEx muscle samples as controls, as the youngest sample in  
105 GTEx is an 18-year-old (yo) individual (with most of the samples 65+), and the muscle samples  
106 were from the gastrocnemius muscle or designated as from “below the patella.” Thus, controls  
107 were selected from our own disease cohort excluding any sample with known *NEB*-related

108 disease. The only available RNA-seq samples from biceps tissue were from adults. All RNA-seq  
109 samples in our cohort with biopsies taken at early childhood are from the quadriceps muscle. We  
110 therefore selected two age-matched control samples and two controls matching the biopsy site.  
111 Sashimi plots were generated with ggsashimi (Garrido-Martín et al., 2018).

112

### 113 *Transcript Usage*

114 The MANE select and MANE plus Clinical transcripts for *NEB* are NM\_001164508.2  
115 and NM\_001164507.2, respectively. Although the MANE select transcript is used to report *NEB*  
116 variants in ClinVar and gnomAD, we utilized the alternative transcript NM\_001271208.2 in this  
117 study. The MANE select and MANE plus Clinical transcripts each contains only one of the two  
118 mutually exclusive exons 143 and 144 and are thus both labeled as “exon 143” in their respective  
119 transcripts. To preserve clarity as we discuss both exons, we use the non-biological  
120 NM\_001271208.2 transcript, which contains both exons 143 and 144.

121

### 122 *Muscle MRI imaging and relative exon expression analysis*

123 Muscle MRI was performed using conventional T1-weighted spin echo and short tau  
124 inversion recovery (STIR) of the lower extremities. Multiple sequences including axial STIR and  
125 T1 images were obtained at 3 Tesla without vascular contrast administration.

126 T1 axial images of proximal and distal lower extremities were reviewed in detail to note  
127 pattern of muscle involvement and fibroadipose transformation (Lamminen, 2014; Ortolan et al.,  
128 2015) to include a qualitative Modified Mercuri Scoring (MMS) of the thigh and lower legs as  
129 previously done by Perry and his colleagues (MMS: 0= Normal appearance; 1= Early fat  
130 infiltration, scattered areas of T1 high signal; 2= Numerous discrete areas of T1 high signal with

131 beginning confluence <30% of the volume; 3= Fat infiltration 30–60% of volume; 4= Fat  
132 infiltration >60% of the volume; 5= End stage, no residual muscle tissue (Perry et al., 2023). P1  
133 MMS and P2 MMS (calculated on his muscle MRI from teenage years) were averaged per  
134 muscle to reflect detailed exon 144 skipping genotype pattern. MRI of age-matched Control *NEB*  
135 patients (ie *NEB* patients with variants other than *NEB* c.21522+3A>G) were selected from *NEB*  
136 patients reported by Perry et al 2023, and mean MMS was calculated from reported scores  
137 (supplemental table 3) (Perry et al., 2023).

138 Current literature was reviewed to identify the reported relative expression of exon 143  
139 and 144 across lower limb muscles in adult humans and mice (Supplemental Table 2). The  
140 collected data was subsequently binned into four qualitative categories per muscle: 1) Exon 144  
141 only, 2) Exon 144 was expressed more than Exon 143, 3) Exon 143 was expressed equally with  
142 Exon 144 and 4) majority Exon 143. Where human data conflicted with mouse data, human data  
143 was used to make Figure D6. If no human data was available and a conflict found between  
144 mouse datasets, the more quantitative dataset from Uapinyoying et al 2020 was used to make  
145 Figure D6. The muscle MRI grading for each muscle was then compared to the relative  
146 expression of exons 143 and 144.

## 147 **Results**

### 148 *Clinical Presentation.*

149 Patient (P1) is a young adult male of American and Asian ancestry. He was born to non-  
150 consanguineous parents at 42 weeks gestational age via Cesarean section. Pregnancy was  
151 complicated by decreased fetal movements. Early gross motor milestones were attained on time,  
152 achieving independent ambulation at the upper limit of normal. Early walking gait was described  
153 as wide-based, waddling and with inward rotation of the knees. During childhood he was noted

154 to have facial weakness, while fine motor, language and cognitive development were normal. On  
155 physical exam at age in early childhood, he had a high-arched, narrow palate, facial weakness,  
156 atrophic gluteal muscles, proximal more than distal muscle weakness and a positive Gowers’  
157 maneuver. Gait was described as wide-based and waddling with exaggerated effort to perform  
158 knee extension. Additionally, he was noted to have hyperlaxity in joints of the hands and  
159 contractures of the Achilles tendons. Creatine Kinase (CK) levels were reportedly normal  
160 throughout childhood. Electromyography studies were consistent with non-irritable myopathy. A  
161 muscle biopsy performed in early childhood showed non-specific myopathic changes without  
162 nemaline rods on histology (Figure A). Electron microscopy was not available. Echocardiogram  
163 and pulmonary function studies were within normal limits. Serial examinations in late childhood  
164 and teenage years demonstrated slightly improved muscle strength throughout (Table 1, available  
165 on request). At examination as a young adult, the patient reports worsening muscle weakness and  
166 stamina along with weight gain, difficulty chewing, frequent falls, myopia, hypertension, and  
167 borderline conductive hearing loss secondary to multiple episodes of otitis media. The  
168 hypertension and worsening muscle weakness may be the result of significant weight gain.

169 Patient (P2) is a teenage male. Pregnancy was complicated by decreased fetal movement  
170 in one of the twins. He was born at 38 weeks gestational age via C-section due to transverse  
171 positioning. There were no concerns at birth, and early milestones were normal. At early  
172 childhood, P2’s parents noted that he had difficulty climbing stairs. On physical examination in  
173 childhood, he had a transverse smile, atrophic gluteal muscles, proximal muscle weakness and an  
174 exaggerated Trendelenburg gait with arm pumping. He had a negative Gowers’ maneuver  
175 (Figure A). CK levels were normal. Examination at age late childhood showed slightly improved  
176 muscle strength. Electromyography studies performed revealed findings suggestive of a non-



177 irritable myopathy. As a teenager, P2 reported a regular regimen of weight training and stable to  
178 improved strength, although noted recent difficulty with chewing tough foods. Echocardiogram  
179 and pulmonary function testing have been normal (Table 1, available on request).

180

181 *Exome Sequencing identified biallelic variants in NEB.*

182         Quartet exome sequencing (ES) was performed, which identified compound  
183 heterozygous variants in *NEB* (NM\_001271208.2) in both individuals. The maternally inherited  
184 variant (c.2079C>A; p.Cys693Ter) results in an early stop codon in exon 22 and is predicted to  
185 induce nonsense mediated decay. This variant is reported in 3 individuals in gnomAD exomes  
186 v4.0.0 with a Grpmax filtering allele frequency (European, non-Finnish) of 0.000002280%  
187 (Karczewski et al., 2022; Whiffin et al., 2017). The paternally inherited variant (c.21522+3A>G;  
188 rs148950085) is adjacent to exon 144. The c.21522+3A>G variant has conflicting interpretations  
189 of pathogenicity in ClinVar based on 6 submissions, 4 pathogenic and two Uncertain  
190 Significance (Variant ID 430110) and is predicted to result in donor loss via in-silico tools  
191 (CADD prediction v1.6 24 (Rentzsch et al., 2021); spliceAI 0.71, (Jaganathan et al., 2019)). This  
192 variant has also been reported as pathogenic in several recently published cohorts when in trans  
193 with a missense or truncating *NEB* variant, but never in homozygosity (Supplemental Table 1,  
194 available on request) (Lee et al., 2017; Wang et al., 2020; Wen et al., 2020). This variant has a  
195 Grpmax filtering allele frequency (East Asian) of 0.001567% in gnomAD exomes and genomes  
196 v4.0.0 and one homozygote is reported. The presence of one homozygote in gnomAD does not  
197 exclude pathogenicity for two reasons. Firstly, the age of this individual is unknown and biallelic  
198 *NEB* variants have been reported to cause disease late in life, and secondly, hypomorphic splice  
199 variants are reported to cause disease only in trans with a pathogenic variant but not when found

200 in a homozygous state (Zernant et al., 2017). P1 and P2 report paternal Asian ancestry, and it has  
201 been suggested that c.21522+3A>G originates from a common Asian ancestor (Lee et al., 2017;  
202 Wang et al., 2020; Wen et al., 2020). While the highest population frequency for this variant is  
203 found in East Asians, it is also reported in the gnomAD exomes and genomes v4.0.0 database in  
204 the South Asian population with a frequency of 0.0002624 (22/ 22766 alleles) to the exclusion of  
205 any additional populations (Karczewski et al., 2022; Whiffin et al., 2017). In summary, this  
206 suggests that P1 and P2 share compound heterozygous variants which cause nemaline myopathy,  
207 one variant which is only reported in East and South Asian populations and the mechanism for  
208 disease remains unclear. No other candidate variants were identified by exome sequencing.

209

210 *RNA sequencing confirms NEB c.21522+3A>G causes impaired splicing.*

211 To evaluate the effect of the biallelic *NEB* variants identified in ES, whole transcriptomic  
212 sequencing on P1 muscle was performed. At the location of the c.2079C>A; p.Cys693Ter  
213 variant, DNA sequencing shows a balanced (50:50) heterozygous C>A variant while the RNA  
214 sequencing shows allelic imbalance in favor of the wild-type allele (83% G to 17% T,  
215 Supplemental Figure 1), suggestive of nonsense mediated decay of the maternal allele transcript  
216 with the c.2079C>A; p.Cys693Ter variant. Additionally, exon coverage throughout the *NEB*  
217 gene seems to be reduced compared to control RNA-seq samples, although this cannot be  
218 assessed with certainty without quantification and normalization for library size. At the location  
219 of the intronic c.21522+3A>G variant, almost complete exclusion of exon 144 is seen in the  
220 patient sample compared to age-matched controls (Figure B and Supplemental Figure 3).  
221 Although no age- and biopsy-matched samples are available for comparison, RNA-seq data from  
222 adult biceps similarly shows that exon 144 is excluded in P1 compared with controls

223 (Supplemental Figure 2). As no relative expression data is reported for biceps (Donner et al.,  
224 2004, 2006; Laitila et al., 2012; Lam et al., 2018; Uapinyoying et al., 2020), it is possible that in  
225 biceps exon 144 is not included normally. In addition, a developmental difference cannot be  
226 excluded as our patient was early childhood at the time of biopsy, whereas the controls were  
227 adults. However, there is one report of an 18-year-old female patient with a different base pair  
228 change (A>C instead of A>G) at the same site as our variant, causing cryptic donor activation  
229 leading to exon 144 extension (Cummings et al., 2017). This was assessed in RNA-seq data  
230 obtained from either vastus lateralis or biceps muscle (Cummings et al., 2017). Notably, we  
231 observe six novel isoform reads containing exon 144 extension due to the same cryptic donor  
232 activation as reported in the A>C variant in our patient sample but not in controls (Supplemental  
233 Figure 2 and 3). While the region between exons 142-145 contain multiple splice junctions, the  
234 exon 144 exclusion and six reads supporting cryptic donor activation are the only differences in  
235 the patient sample compared with controls (Supplemental Figure 2 and 3). Irrespective if the  
236 c.21522+3A>G variant causes intron retention or cryptic donor activation with exon extension,  
237 we expect that the variant in P1 causes complete loss of the exon 144 containing protein isoform  
238 due to a PTC after 7 amino acids, leaving only the exon 143 isoform available for translation  
239 (Figure C).

240

241 *Muscle MRI imaging have a distinct pattern of involvement.*

242 Muscle MRI of P1 (as a teenager) and P2 (as a teenager) reveals striking proximal  
243 involvement of the vasti muscles, adductor magnus, biceps femoris and semimembranosus  
244 (mMMS: 2.5-5) (Figure D, Supplemental Table 3). In contrast, age-matched control NEB  
245 patients are relatively spared for the same muscle groups (mMMS: 0.75-1.0) (Perry et al., 2023).

246 The rectus femoris, semitendinosus, sartorius, gracilis and adductor longus are relatively spared  
247 for both our patients and controls (mMMS P1/P2: 0-2; mMMS control: 0.5-0.75) (Figure D,  
248 Supplemental Table 3) (Perry et al., 2023). However, it is worth noting that P1 rectus femoris  
249 muscle was extensively replaced by fibroadipose tissue and rated as MMS 4, while P2 rectus  
250 femoris muscle was spared and rated as 0 (Supplemental Table 3).

251 Distally, P1 and P2 have striking involvement of the soleus and lateral gastrocnemius  
252 muscles (mMMS: 4-4.25), with sparing of the anterior compartment (mMMS: 0).

253 Comparatively, control NEB patients presented with mild involvement of the soleus and lateral  
254 gastrocnemius (mMMS: 1.25-2) and the anterior compartment (mMMS: 1.5) (Perry et al., 2023).

255 The medial gastrocnemius and tibialis posterior show mild involvement for both our patients and  
256 control(s?) (mMMS P1/P2: 1.5-2.0; mMMS control: 0.75-1.0) (Figure D, supplemental table 3)  
257 (Perry et al., 2023).

258

## 259 **Discussion**

260

261 Rare congenital myopathies and dystrophies frequently pose diagnostic challenges  
262 considering that several important disease-causing genes expressed in skeletal muscle are  
263 exceedingly long and have complex splicing patterns. Here we present two affected individuals  
264 each carrying a c.21522+3A>G variant near the mutually exclusive exon 144 of *NEB*  
265 (NM\_001271208.2) in trans with a truncating *NEB* variant. A literature review on mutually  
266 exclusive exons 143 and 144 suggests that once adulthood is reached, the relative abundance of  
267 these two isoforms vary amongst muscles. Many of these muscles exhibit a shift from  
268 predominant exon 143 expression early in development to exon 144 with age, although most  
269 muscles express a mixture of both isoforms (Figure D6, Supplemental Table 2) (Donner et al.,

270 2004, 2006; Laitila et al., 2012; Lam et al., 2018; Uapinyoying et al., 2020). However, relative  
271 abundance was analyzed mostly via qPCR data in mouse tissue, with only a small amount of  
272 human muscle contributing, and excepting one study provided no correlation between mRNA  
273 abundance and protein levels (Donner et al., 2004, 2006; Laitila et al., 2012; Lam et al., 2018;  
274 Uapinyoying et al., 2020). More work to systematically establish the precise distributions in  
275 human muscle and elucidate the functional roles needs to be done to aid interpretation of variant  
276 pathogenicity in these mutually exclusive exons.

277         The c.21522+3A>G splice variant found in our patients has recently been reported in  
278 patients with nemaline myopathy (Lee et al., 2017; Wang et al., 2020; Wen et al., 2020).  
279 Previously, RT-PCR performed on patient muscle cDNA to interpret the functional impact of the  
280 c.21522+3A>G variant suggested the generation of a splice isoform that excluded both exons  
281 143 and 144, splicing exon 142 directly to exon 145 (Wang et al., 2020). With RNA sequencing,  
282 however, a more complex story emerges as both patient and controls show a few reads splicing  
283 exons 142 to 145, suggesting that this is a rare but normal isoform (Supplemental Figure 2 and  
284 3). This is corroborated in GTEx muscle samples (Supplemental Figure 4). Instead, we observe  
285 loss of exon 144 and 6 unique reads mapping to a cryptic donor site, suggestive of exon 144  
286 extension leading to nonsense mediated decay (Figure B and supplemental figures 2 and 3).  
287 While we cannot be certain of the precise splice isoform generated due to low read depth at the  
288 cryptic donor site in our patient sample, we can be confident that the variant causes loss of exon  
289 144 isoforms when in trans with a nonsense variant (Figure C: Splicing Diagram). Utilizing  
290 transcriptomic sequencing for analysis of this complex splice region provided insight into  
291 pathogenesis unobtainable through methods like RT-PCR.

292           Considering the developmental roles of exons 143 and 144 reported in the literature,  
293 transcriptomic sequencing can be difficult to interpret in this complex region of *NEB*, and choice  
294 of control is especially important (Donner et al., 2004, 2006; Lam et al., 2018). This is illustrated  
295 by a variant in a 3-year-old male with congenital myopathy at the +4 site published by  
296 Cummings et al., 2017, where RNA sequencing derived from biceps muscle demonstrated  
297 switching to exon 143-containing transcripts. However, as one control sample similarly showed  
298 this isoform switching, the authors concluded that this is not a pathogenic variant. Examination  
299 of supplemental data reveals that this control sample is from a 1-year-old female with unknown  
300 biopsy origin and may thus not be sufficient evidence to exclude pathogenicity of the extended  
301 splice variant (Cummings et al., 2017). Although the unbiased approach of RNA sequencing can  
302 better detect complex splice events, these alternatively spliced isoforms prove difficult to assess  
303 considering the variability by age and muscle type in healthy tissue.

304           Our patients presented with a pattern of muscle involvement atypical to the primarily  
305 distal involvement reported for *NEB* nemaline myopathy (Figure D) (Jungbluth et al., 2004;  
306 Perry et al., 2023; Scoto et al., 2013). Notably, there is one report of a 54-year-old woman with  
307 biallelic variants in *NEB* and primarily proximal muscle involvement (Wunderlich et al., 2018).  
308 Since exon 144-containing isoforms are lost in our patients, we thought to examine if the MRI  
309 pattern of involvement follow the distribution of exon 144. When comparing our patient muscle  
310 MRI to the established literature on the adult relative distribution of exons 143/144 isoforms  
311 (Figure D6, Supplemental Table 2, Supplemental Table 3), muscles that are known to contain  
312 higher or equal exon 143 expression (sartorius, gracilis, semitendinosus, tibialis anterior and  
313 extensor digitorum longus) were shown to be relatively spared while muscles with higher  
314 amounts of exon 144 (vastus lateralis, vastus medialis, lateral gastrocnemius and soleus) were

315 more affected (Figure D). Notably, the rectus femoris, biceps femoris, adductors longus/magnus  
316 and medial gastrocnemius did not fit with the distribution of exon 144 (Figure D). Intriguingly,  
317 the rectus femoris was significantly involved in P1 (MMS=4) while uninvolved in P2 (MMS=0),  
318 suggesting that exon 144 expression cannot completely explain P1's MRI (Supplemental Table  
319 3). Additionally, the long head of the biceps femoris was strikingly involved in our patients  
320 (mMMS=4.5), while the short head was uninvolved (mMMS=0), but no data was available  
321 regarding which part of the biceps femoris was surveyed in relative abundance studies (Figure D,  
322 Supplemental table 3). The adductor magnus is described as containing both isoforms in the  
323 literature, with no specific relative abundance for comparison (Figure D6, Supplemental Table  
324 3). The semimembranosus is described as having less 144 than the adductor longus, but no  
325 relative expression data is available and thus may well have more 144 than 143, which would fit  
326 with the involvement seen in our patients. The overall impression is that the patient MRI findings  
327 fit with the known pattern of exon 144 distribution more than with what had been published in  
328 the literature. However, one recent published report of childhood onset nemaline myopathy due  
329 to a nonsense variant in trans with the c.21522+3A>G variant provides MRI imaging taken in  
330 adulthood refuting our analysis (Wen et al., 2020). This patient is reported to have muscle  
331 involvement typical of nemaline myopathy, including involvement in the tibialis anterior,  
332 although muscle grading is not provided for comparison and the images are insufficient (Wen et  
333 al., 2020). Although a functional improvement in strength was noted for P2, the MRI data  
334 showed mild progression of fibroadipose replacement of affected muscles, which may be due to  
335 the increased reliance these muscles have on exon 144 as adulthood is reached (Figure D2-3).  
336 Additional MRI imaging taken at several timepoints from patients with variants impacting exon

337 144 *NEB* splicing are needed to establish whether perhaps there may be a variant-specific pattern  
338 of muscle involvement on MRI.

339         Understanding the unique roles these mutually exclusive exons play in the sarcomere  
340 may be important both to understand muscle development and to identify therapeutic approaches  
341 in *NEB*-related myopathy. Considering that the *NEB* gene contains other notable alternatively  
342 spliced regions (exons 63-66, 82-105, and 166-177), insight into the function of exons 143 and  
343 144 may inform investigations into these other regions (Donner et al., 2004). Besides their  
344 different relative abundance, the mutually exclusive isoforms that contain exon 143 or 144 differ  
345 in charge and hydrophobicity, and exon 144 contains a predicted protein kinase C  
346 phosphorylation site (Donner et al., 2004). A step towards gaining insight into the roles of these  
347 isoforms may be through uncovering a genotype-phenotype correlation. With the heterogeneity  
348 of disease clinical presentation, no genotype-phenotype relationship is currently established for  
349 pathogenic variants in *NEB* (Amburgey et al., 2021; Sewry et al., 2019). To date, patients  
350 described with the c.21522+3A>G splice variant have been categorized with congenital-onset or  
351 mild-onset disease, but none with severe disease (Supplemental Table 1, available on request)  
352 (Lee et al., 2017; Wang et al., 2020). Furthermore, a patient with a homozygous deep intronic  
353 variant in intron 144 leading to complete loss of exon 144 was reported with a phenotype of  
354 congenital-onset nemaline myopathy and proximal more than distal weakness (Laflamme et al.,  
355 2021). Given the adult role of exon 144, it is possible that untampered expression of  
356 developmentally necessary exon 143 helps maintain the sarcomere and prevents severe disease.  
357 Although a consensus exists for the diametric roles of these isoforms (supplemental Table 2),  
358 one study challenges this binary understanding (Donner et al., 2006; Lam et al., 2018). When  
359 probed in cell culture as opposed to muscle tissue, exon 144 is expressed exclusively in



360 myoblasts, switching to exon 143 expression upon differentiation into early myotubes (Lam et  
361 al., 2018). Further work to understand the full pattern of expression will be important to properly  
362 understand the function of these exons.

363 Finally, *NEB*-related myopathy is typically a form of nemaline myopathy (Table 1,  
364 available on request), so the absence of the hallmark finding of nemaline rods in the muscle  
365 biopsy in our patients is noteworthy (Figure A), since all reported patients with the  
366 c.21522+3A>G variant were found to have nemaline rods on biopsy (Lee et al., 2017; Wang et  
367 al., 2020; Wen et al., 2020). In nemaline myopathies in general, the presence and percentage of  
368 rods in a patient biopsy can be variable and, although diagnostically helpful, may not correlate  
369 with disease severity (Sewry et al., 2019; Wang et al., 2020). Furthermore, given the differential  
370 muscle involvement evident on imaging, it is conceivable that nemaline rods could indeed be  
371 found in another muscle. Thus, the absence of nemaline rod pathology in our patients does not  
372 rule out the diagnosis, but highlights the importance of still considering *NEB*-related myopathy  
373 in the compatible clinical context, while taking into consideration the many complexities of the  
374 *NEB* gene as evident on genomic and transcriptional analysis (Wallgren-Pettersson et al., 2007).

375

#### 376 *Future Directions*

377 Additional patients and research are needed, especially to assess how lack of exon 144-  
378 containing transcripts affects muscle function and patterns of involvement. Further work to  
379 validate the relative abundance of these isoforms in humans and their functional or regulatory  
380 impact will better aid our understanding of muscle development and disease pathogenesis.  
381 Finally, while to our knowledge this is the first report of disease pathogenesis through the  
382 alteration of isoform distribution, we speculate that more examples of splice active variants

383 skewing alternative splicing may be found, establishing this as a pathogenic mechanism for  
384 neuromuscular disease.

385

### 386 **Supplemental Information**

387 Supplemental Information includes three tables and four figures

388

### 389 **Declaration of interests**

390 The authors have no conflicts of interest to declare

391

### 392 **Acknowledgement**

393 We would like to thank the families for their participation. The work in C.G. Bönnemann's  
394 laboratory is supported by intramural funds from the NIH National Institute of Neurological  
395 Disorders. Sequencing and analysis were provided by the Broad Institute of MIT and Harvard  
396 Center for Mendelian Genomics (Broad CMG) and was funded by the National Human Genome  
397 Research Institute, the National Eye Institute, the National Heart, Lung and Blood Institute and  
398 grant UM1HG008900 to Daniel MacArthur and Heidi Rehm. This study makes use of data  
399 shared through the seqr platform with funding provided by National Institutes of Health grants  
400 R01HG009141 and UM1HG008900.

401

402 The Genotype-Tissue Expression (GTEx) Project was supported by the Common Fund of the  
403 Office of the Director of the National Institutes of Health, and by NCI, NHGRI, NHLBI, NIDA,  
404 NIMH, and NINDS. The data used for the analyses described in this manuscript were obtained  
405 from dbGaP accession number phs000424.v8.p2 on 09/25/2023.

406

407 This research was made possible through the NIH Medical Research Scholars Program, a public-  
408 private partnership supported jointly by the NIH and contributions to the Foundation for the NIH  
409 from the Doris Duke Charitable Foundation, Genentech, the American Association for Dental  
410 Research, the Colgate-Palmolive Company, and other private donors.

411

## 412 **Web Resources**

413 <http://www.omim.org/>

414 <https://gnomad.broadinstitute.org/>

415 <https://www.ncbi.nlm.nih.gov/clinvar/>

416 <https://www.ncbi.nlm.nih.gov/snp/>

417 <https://muscleviz.github.io> (Wittenbach et al., 2019)

418

## 419 **Data and Code Availability**

420

## 421 **References**

- 422 Amburgey, K., Acker, M., Saeed, S., Amin, R., Beggs, A. H., Bönnemann, C. G., Brudno, M.,  
423 Constantinescu, A., Dastgir, J., Diallo, M., Genetti, C. A., Glueck, M., Hewson, S., Hum,  
424 C., Jain, M. S., Lawlor, M. W., Meyer, O. H., Nelson, L., Sultanum, N., ... Dowling, J. J.  
425 (2021). A Cross-Sectional Study of Nemaline Myopathy. *Neurology*, *96*(10), e1425–e1436.  
426 <https://doi.org/10.1212/WNL.0000000000011458>
- 427 Cummings, B. B., Marshall, J. L., Tukiainen, T., Lek, M., Donkervoort, S., Foley, A. R., Bolduc,  
428 V., Waddell, L. B., Sandaradura, S. A., O’Grady, G. L., Estrella, E., Reddy, H. M., Zhao,  
429 F., Weisburd, B., Karczewski, K. J., O’Donnell-Luria, A. H., Birnbaum, D., Sarkozy, A.,  
430 Hu, Y., ... MacArthur, D. G. (2017). Improving genetic diagnosis in Mendelian disease  
431 with transcriptome sequencing. *Science Translational Medicine*, *9*(386).  
432 <https://doi.org/10.1126/scitranslmed.aal5209>
- 433 Donner, K., Nowak, K. J., Aro, M., Pelin, K., & Wallgren-Pettersson, C. (2006). Developmental  
434 and muscle-type-specific expression of mouse nebulin exons 127 and 128. *Genomics*, *88*(4),  
435 489–495. <https://doi.org/10.1016/J.YGENO.2006.06.008>

- 436 Donner, K., Sandbacka, M., Lehtokari, V. L., Wallgren-Pettersson, C., & Pelin, K. (2004).  
437 Complete genomic structure of the human nebulin gene and identification of alternatively  
438 spliced transcripts. *European Journal of Human Genetics* 2004 12:9, 12(9), 744–751.  
439 <https://doi.org/10.1038/sj.ejhg.5201242>
- 440 Freiburg, A., Trombitas, K., Hell, W., Cazorla, O., Fougerousse, F., Centner, T., Kolmerer, B.,  
441 Witt, C., Beckmann, J. S., Gregorio, C. C., Granzier, H., & Labeit, S. (2000). Series of  
442 exon-skipping events in the elastic spring region of titin as the structural basis for  
443 myofibrillar elastic diversity. *Circulation Research*, 86(11), 1114–1121.  
444 <https://doi.org/10.1161/01.RES.86.11.1114>
- 445 Garrido-Martín, D., Palumbo, E., Guigó, R., & Breschi, A. (2018). ggsashimi: Sashimi plot  
446 revised for browser- and annotation-independent splicing visualization. *PLOS*  
447 *Computational Biology*, 14(8), e1006360.  
448 <https://doi.org/10.1371/JOURNAL.PCBI.1006360>
- 449 Jaganathan, K., Kyriazopoulou Panagiotopoulou, S., McRae, J. F., Darbandi, S. F., Knowles, D.,  
450 Li, Y. I., Kosmicki, J. A., Arbelaez, J., Cui, W., Schwartz, G. B., Chow, E. D., Kanterakis,  
451 E., Gao, H., Kia, A., Batzoglou, S., Sanders, S. J., & Farh, K. K. H. (2019). Predicting  
452 Splicing from Primary Sequence with Deep Learning. *Cell*, 176(3), 535-548.e24.  
453 <https://doi.org/10.1016/J.CELL.2018.12.015>
- 454 Jungbluth, H., Sewry, C. A., Counsell, S., Allsop, J., Chattopadhyay, A., Mercuri, E., North, K.,  
455 Laing, N., Bydder, G., Pelin, K., Wallgren-Pettersson, C., & Muntoni, F. (2004). Magnetic  
456 resonance imaging of muscle in nemaline myopathy. *Neuromuscular Disorders* □: NMD,  
457 14(12), 779–784. <https://doi.org/10.1016/J.NMD.2004.08.005>
- 458 Karczewski, K. J., Solomonson, M., Chao, K. R., Goodrich, J. K., Tiao, G., Lu, W., Riley-Gillis,  
459 B. M., Tsai, E. A., Kim, H. I., Zheng, X., Rahimov, F., Esmaeeli, S., Grundstad, A. J.,  
460 Reppell, M., Waring, J., Jacob, H., Sexton, D., Bronson, P. G., Chen, X., ... Neale, B. M.  
461 (2022). Systematic single-variant and gene-based association testing of thousands of  
462 phenotypes in 426,370 UK Biobank exomes. *MedRxiv*, 2021.06.19.21259117.  
463 <https://doi.org/10.1101/2021.06.19.21259117>
- 464 Laflamme, N., Lace, B., Thonta Setty, S., Rioux, N., Labrie, Y., Droit, A., Chrestian, N., &  
465 Rivest, S. (2021). A Homozygous Deep Intronic Mutation Alters the Splicing of Nebulin  
466 Gene in a Patient With Nemaline Myopathy. *Frontiers in Neurology*, 12.  
467 <https://doi.org/10.3389/FNEUR.2021.660113>
- 468 Laitila, J., Hanif, M., Paetau, A., Hujanen, S., Keto, J., Somervuo, P., Huovinen, S., Udd, B.,  
469 Wallgren-Pettersson, C., Auvinen, P., Hackman, P., & Pelin, K. (2012). Expression of  
470 multiple nebulin isoforms in human skeletal muscle and brain. *Muscle & Nerve*, 46(5), 730–  
471 737. <https://doi.org/10.1002/MUS.23380>
- 472 Lam, L. T., Holt, I., Laitila, J., Hanif, M., Pelin, K., Wallgren-Pettersson, C., Sewry, C. A., &  
473 Morris, G. E. (2018). Two alternatively-spliced human nebulin isoforms with either exon  
474 143 or exon 144 and their developmental regulation. *Scientific Reports*, 8(1).  
475 <https://doi.org/10.1038/S41598-018-33281-6>
- 476 Lamminen, A. E. (2014). Magnetic resonance imaging of primary skeletal muscle diseases:  
477 patterns of distribution and severity of involvement. [Http://Dx.Doi.Org/10.1259/0007-1285-](http://Dx.Doi.Org/10.1259/0007-1285-63-756-946)  
478 [63-756-946](https://doi.org/10.1259/0007-1285-63-756-946), 63(756), 946–950. <https://doi.org/10.1259/0007-1285-63-756-946>
- 479 Lee, J. M., Lim, J. G., Shin, J. H., Park, Y. E., & Kim, D. S. (2017). Clinical and genetic  
480 diversity of nemaline myopathy from a single neuromuscular center in Korea. *Journal of the*  
481 *Neurological Sciences*, 383, 61–68. <https://doi.org/10.1016/J.JNS.2017.10.020>

- 482 Lehtokari, V.-L., Kiiski, K., Sandaradura, S. A., Laporte, J., Repo, P., Frey, J. A., Donner, K.,  
483 Marttila, M., Saunders, C., Barth, P. G., den Dunnen, J. T., Beggs, A. H., Clarke, N. F.,  
484 North, K. N., Laing, N. G., Romero, N. B., Winder, T. L., Pelin, K., & Wallgren-Pettersson,  
485 C. (2014). Mutation update: the spectra of nebulin variants and associated myopathies.  
486 *Human Mutation*, 35(12), 1418–1426. <https://doi.org/10.1002/humu.22693>
- 487 Nakka, K., Ghigna, C., Gabellini, D., & Dilworth, F. J. (2018). Diversification of the muscle  
488 proteome through alternative splicing. *Skeletal Muscle* 2018 8:1, 8(1), 1–18.  
489 <https://doi.org/10.1186/S13395-018-0152-3>
- 490 Nikonova, E., Kao, S. Y., & Spletter, M. L. (2020). Contributions of alternative splicing to  
491 muscle type development and function. *Seminars in Cell & Developmental Biology*, 104,  
492 65–80. <https://doi.org/10.1016/J.SEMCDB.2020.02.003>
- 493 Ortolan, P., Zanato, R., Coran, A., Beltrame, V., & Stramare, R. (2015). Role of Radiologic  
494 Imaging in Genetic and Acquired Neuromuscular Disorders. *European Journal of*  
495 *Translational Myology*, 25(2), 121. <https://doi.org/10.4081/EJTM.2015.5014>
- 496 Perry, L., Stimpson, G., Singh, L., Morrow, J. M., Shah, S., Baranello, G., Muntoni, F., &  
497 Sarkozy, A. (2023). Muscle magnetic resonance imaging involvement patterns in nemaline  
498 myopathies. *Annals of Clinical and Translational Neurology*, 10(7), 1219–1229.  
499 <https://doi.org/10.1002/ACN3.51816>
- 500 Rentzsch, P., Schubach, M., Shendure, J., & Kircher, M. (2021). CADD-Splice—improving  
501 genome-wide variant effect prediction using deep learning-derived splice scores. *Genome*  
502 *Medicine*, 13(1), 1–12. <https://doi.org/10.1186/S13073-021-00835-9/FIGURES/4>
- 503 Savarese, M., Jonson, P. H., Huovinen, S., Paulin, L., Auvinen, P., Udd, B., & Hackman, P.  
504 (2018). The complexity of titin splicing pattern in human adult skeletal muscles. *Skeletal*  
505 *Muscle*, 8(1). <https://doi.org/10.1186/S13395-018-0156-Z>
- 506 Scoto, M., Cullup, T., Cirak, S., Yau, S., Manzur, A. Y., Feng, L., Jacques, T. S., Anderson, G.,  
507 Abbs, S., Sewry, C., Jungbluth, H., & Muntoni, F. (2013). Nebulin (NEB) mutations in a  
508 childhood onset distal myopathy with rods and cores uncovered by next generation  
509 sequencing. *European Journal of Human Genetics* □: *EJHG*, 21(11), 1249–1252.  
510 <https://doi.org/10.1038/EJHG.2013.31>
- 511 Sewry, C. A., Laitila, J. M., & Wallgren-Pettersson, C. (2019). Nemaline myopathies: a current  
512 view. *Journal of Muscle Research and Cell Motility*, 40(2), 111–126.  
513 <https://doi.org/10.1007/S10974-019-09519-9>
- 514 Thorvaldsdottir, H., Robinson, J. T., & Mesirov, J. P. (2013). Integrative Genomics Viewer  
515 (IGV): high-performance genomics data visualization and exploration. *Briefings in*  
516 *Bioinformatics*, 14(2), 178–192. <https://doi.org/10.1093/bib/bbs017>
- 517 Trapnell, C., Williams, B. A., Pertea, G., Mortazavi, A., Kwan, G., Van Baren, M. J., Salzberg,  
518 S. L., Wold, B. J., & Pachter, L. (2010). Transcript assembly and abundance estimation  
519 from RNA-Seq reveals thousands of new transcripts and switching among isoforms. *Nature*  
520 *Biotechnology*, 28(5), 511. <https://doi.org/10.1038/NBT.1621>
- 521 Uapinyoying, P., Goecks, J., Knoblac, S. M., Panchapakesan, K., Bonneman, C. G., Partridge, T.  
522 A., Jaiswa, J. K., & Hoffma, E. P. (2020). A long-read RNA-seq approach to identify novel  
523 transcripts of very large genes. *Genome Research*, 30(6), 885–897.  
524 <https://doi.org/10.1101/GR.259903.119>
- 525 Wallgren-Pettersson, C., & Laing, N. G. (2000). Report of the 70th ENMC International  
526 Workshop: nemaline myopathy, 11-13 June 1999, Naarden, The Netherlands.

- 527 *Neuromuscular Disorders*: *NMD*, 10(4–5), 299–306. <https://doi.org/10.1016/S0960->  
528 8966(99)00129-7
- 529 Wang, Q., Hu, Z., Chang, X., Yu, M., Xie, Z., Lv, H., Zhang, W., Xiong, H., Yuan, Y., & Wang,  
530 Z. (2020). Mutational and clinical spectrum in a cohort of Chinese patients with hereditary  
531 nemaline myopathy. *Clinical Genetics*, 97(6), 878–889. <https://doi.org/10.1111/CGE.13745>
- 532 Wen, Q., Chang, X., & Guo, J. (2020). A childhood-onset nemaline myopathy caused by novel  
533 heterozygote variants in the nebulin gene with literature review. *Acta Neurologica Belgica*,  
534 120(6), 1351–1360. <https://doi.org/10.1007/S13760-019-01230-3>
- 535 Whiffin, N., Minikel, E., Walsh, R., O'Donnell-Luria, A. H., Karczewski, K., Ing, A. Y., Barton,  
536 P. J. R., Funke, B., Cook, S. A., Macarthur, D., & Ware, J. S. (2017). Using high-resolution  
537 variant frequencies to empower clinical genome interpretation. *Genetics in Medicine* 2017  
538 19:10, 19(10), 1151–1158. <https://doi.org/10.1038/gim.2017.26>
- 539 Wittenbach, J. D., Cocanougher, B. T., Yun, P., Foley, A. R., & Bönnemann, C. G. (2019).  
540 MuscleViz: Free Open-Source Software for Muscle Weakness Visualization. *Journal of*  
541 *Neuromuscular Diseases*, 6(2), 263–266. <https://doi.org/10.3233/JND-190385>
- 542 Wunderlich, G., Brunn, A., Daimagüler, H. S., Bozoglu, T., Fink, G. R., Lehmann, H. C., Weis,  
543 J., & Cirak, S. (2018). Long term history of a congenital core-rod myopathy with compound  
544 heterozygous mutations in the Nebulin gene. *Acta Myologica*, 37(2), 121.  
545 </pmc/articles/PMC6060425/>
- 546 Yuen, M., & Ottenheijm, C. A. C. (2020). Nebulin: big protein with big responsibilities. *Journal*  
547 *of Muscle Research and Cell Motility*, 41(1), 103–124. <https://doi.org/10.1007/S10974-019->  
548 09565-3
- 549 Zernant, J., Lee, W., Collison, F. T., Fishman, G. A., Sergeev, Y. V., Schuerch, K., Sparrow, J.  
550 R., Tsang, S. H., & Allikmets, R. (2017). Frequent hypomorphic alleles account for a  
551 significant fraction of ABCA4 disease and distinguish it from age-related macular  
552 degeneration. *Journal of Medical Genetics*, 54(6), 404–412.  
553 <https://doi.org/10.1136/JMEDGENET-2017-104540>  
554

## 555 **Figure Legends**

556 **Figure A:** Patient Phenotype and Pedigree A) facial weakness, ankle contractures, narrow palate,  
557 and body habitus in P1 (left) and P2 (right). B) strength grading for both P1 and P2 at two  
558 timepoints, diagram created by MuscleViz (<https://muscleviz.github.io/>). C) pedigree and  
559 segregation of NEB variants in our patient family. D) histology from P1, H&E (left) Gomori  
560 Trichrome (middle) and NADH (right), no nemaline rods noted. EM images were unavailable for  
561 analysis.

562

563 **Figure B:** RNA sequencing of NEB exons 143 and 144 in patient P1 and controls. The age  
564 control group is the aggregate of two age matched control samples from quadriceps. Reported as  
565 median junction reads. The biceps control group is an aggregate of three adult patients with  
566 biceps biopsies, aggregate by median junction. The patient biopsy has very few junction reads to  
567 exon 144 compared with both controls. Junctions with less than 10 reads were removed for  
568 clarity. All junctions and individual control samples can be viewed in supplemental figures 2 and  
569 3.

570  
571 **Figure C:** NEB (NM\_001271208.2) gene models illustrating the different splicing patterns  
572 involving the mutually exclusive exons 143 and 144 in control individuals and patients. The  
573 patient variant affects splicing leading to generation of an aberrant exon 144 containing isoform  
574 with a premature stop codon resulting in nonsense mediated decay.

575  
576 **Figure D:** Muscle MRI T1 and relative expression of exons 143 and 144. 1A) Significantly  
577 increased T1 signaling, indicating severe, almost complete, replacement of muscle with  
578 fibroadipose tissue in the vasti, rectus femoris (RF), long head of biceps femoris (BF), adductors  
579 (Ad) with relative sparing of semitendinosus (ST), Sartorius (Sr) and Gracilis (Gr) and milder  
580 involvement of the semimembranosus (SM). 1B) In the lower leg there is fibroadipose  
581 replacement of lateral gastrocnemius (LG) and soleus (So) (right>left) with relative sparing of  
582 anterior compartment muscles. 2A) Increased T1 signaling consistent with fibroadipose  
583 replacement in a patchy distribution in the vastus lateralis (VL), vastus intermedius (VI),  
584 semimembranosus (SM) and long head of biceps femoris (BF) muscles (left>right) in the upper  
585 leg 2B) and patchy fibroadipose replacement of the lateral gastrocnemius (LG) and soleus (So)

586 muscles in the lower leg. 3A) Symmetric patchy fibroadipose replacement of VL and VI with  
587 relative sparing of vastus medialis (VM). In the posterior thigh, there is selective and more  
588 prominent involvement of SM and long head of BF, slightly more significant on the left  
589 compared to the right. RF, Sr, Gr, short head of BF, and ST are selectively spared and appear  
590 hypertrophied. 3B) Fibroadipose replacement of LG, So, and tibialis posterior (TP) with sparing  
591 of the anterior lower leg muscles and medial gastrocnemius (MG). 4) mean Modified Mercuri  
592 Scores reported for age matched *NEB* patients (supplemental table 3) (Perry et al, 2023) 5) mean  
593 Modified Mercuri Scores reported for P1 and P2 (supplemental table 3) 6) Approximate  
594 depiction of relative expression of exons 143 and 144 as reported in the literature (Donner et  
595 al., 2004, 2006; Laitila et al., 2012; Lam et al., 2018; Uapinyoying et al., 2020).

596

597 **Supplemental Figure 1:** A) Reads aligned to Exon 22 in DNA show heterozygous SNP  
598 c.2079C>A; p.(Cys693Ter) present in 50% of reads. B) The variant c.2079C>A; p.(Cys693Ter)  
599 is present only in 11 out of 64 reads in RNAseq of P1, consistent with nonsense mediated decay  
600 prediction for this truncating variant

601

602 **Supplemental Figure 2:** analysis of all isoforms (no junction reads removed) existing in patient  
603 and controls between exons 142-145. The only difference between patient and controls is the  
604 lack of exon 144 inclusion. Note the 6 splice junction reads in patient starting in intron 144 and  
605 ending at exon 145. Patient in purple and three biceps controls in green, all adult (30-50yrs)  
606 biceps have a higher read count of exon 144 compared with 143 in adult biceps

607



608 **Supplemental Figure 3:** Patient compared with two age and sex matched controls, but not  
609 biopsied from the same muscle group. Both exons 143 and 144 are expressed almost equally in  
610 control samples, while the patient sample expresses exon 144 only. Again, Note the 6 splice  
611 junction reads in patient starting in intron 144 and ending at exon 145, which are not seen in  
612 controls.

613  
614 **Supplemental Figure 4:** five randomly selected GTEX muscle samples biopsied from “below  
615 the patella” or “gastrocnemius” all show multiple rare isoforms, including isoforms splicing exon  
616 142 directly to exon 145. Notably, there is no isoform that matches the six reads demonstrating  
617 intron 144 extension in our patient. There is variability in exon 143 expression between  
618 individual samples, although the lack of precise biopsy knowledge makes drawing conclusions  
619 regarding the relative abundance of 143 and 144 from GTEX data difficult.

620

621

Figure A

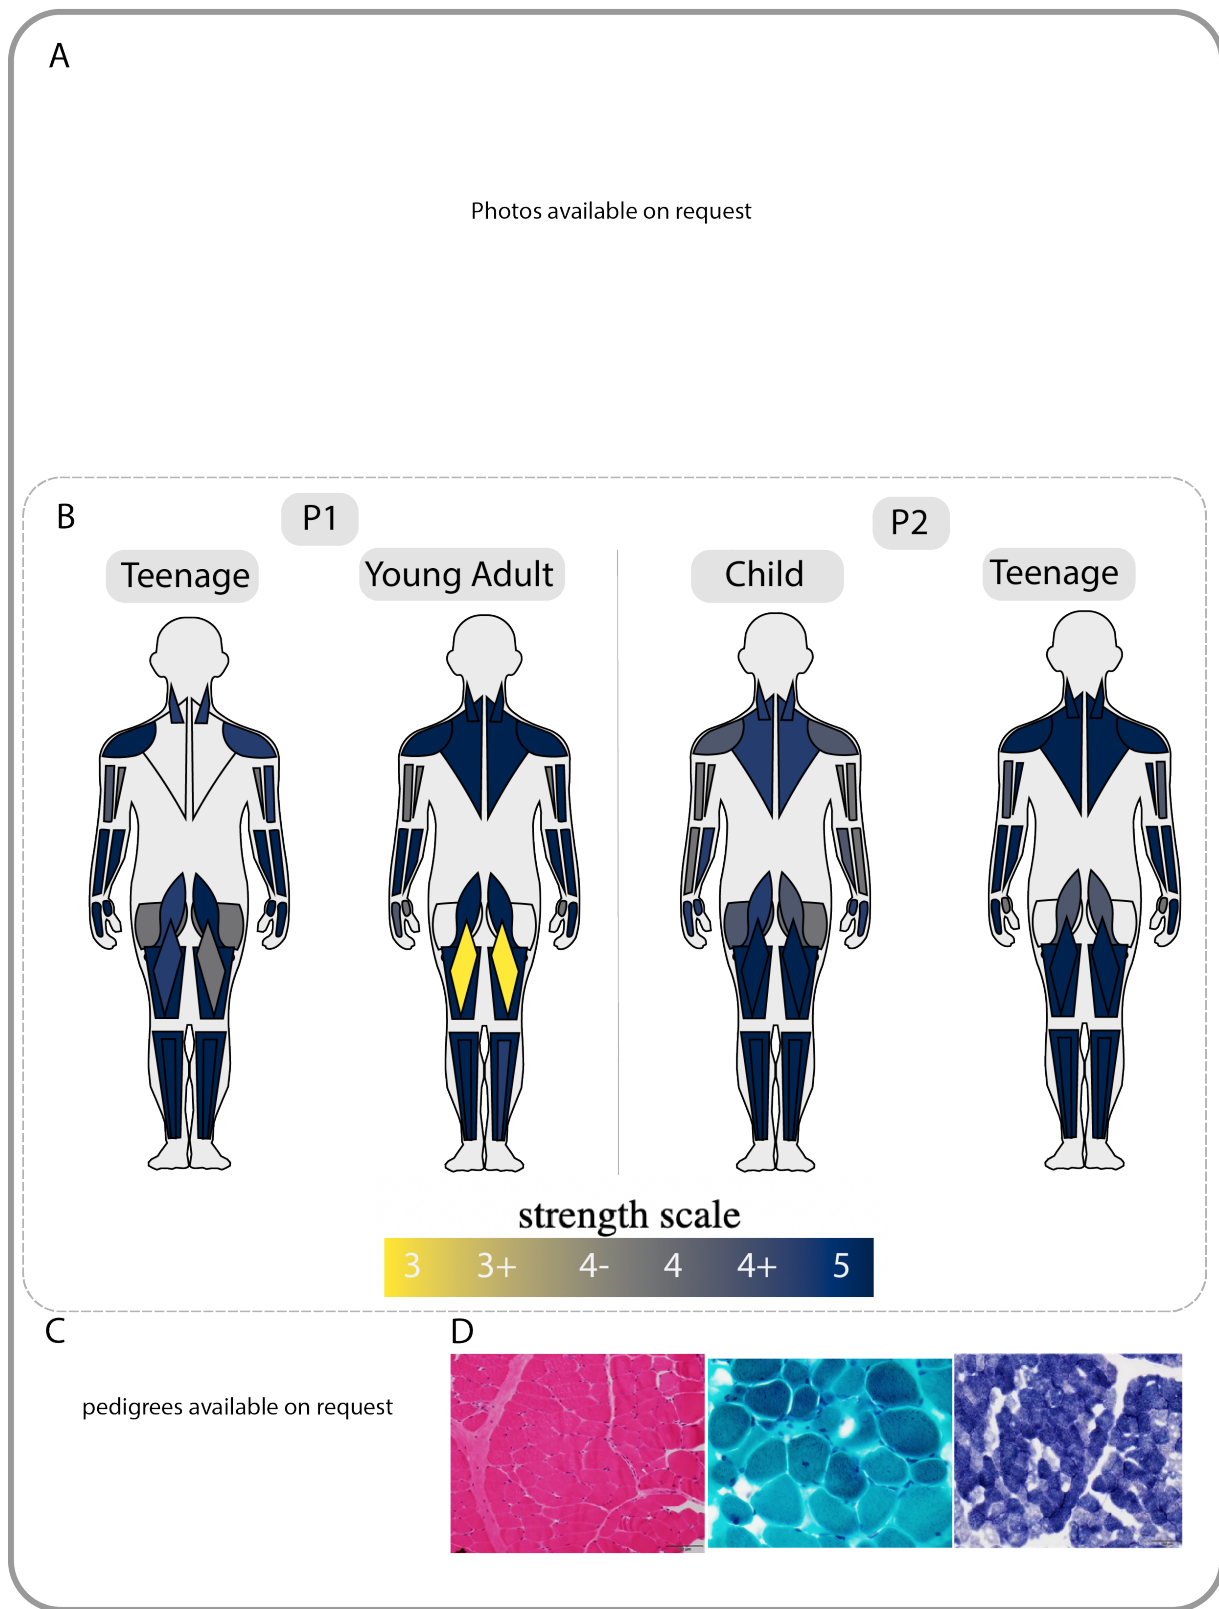

Figure B

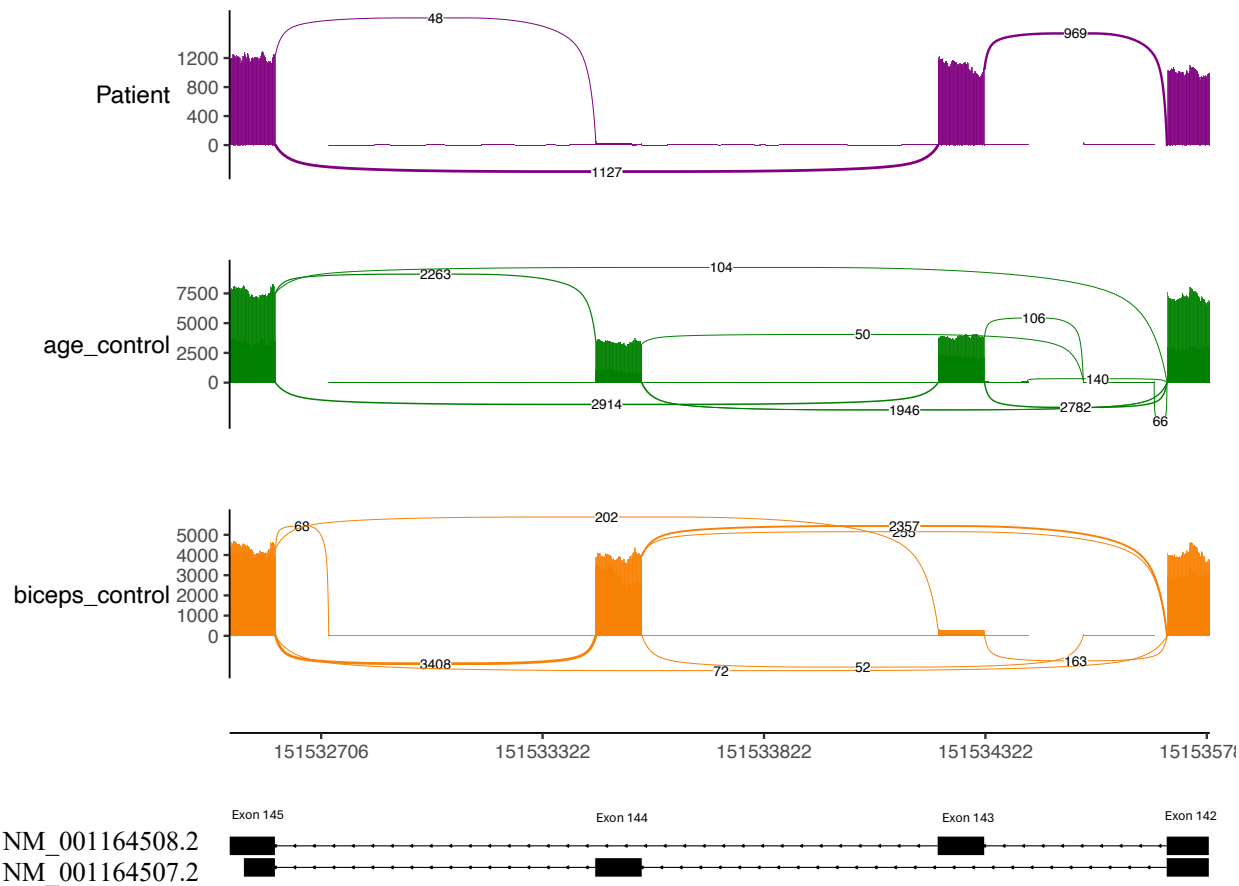

## Figure C

### Wild Type Gene Model

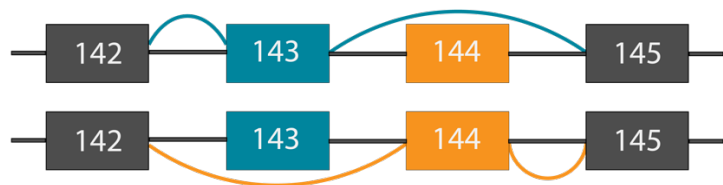

### Wild Type Isoforms

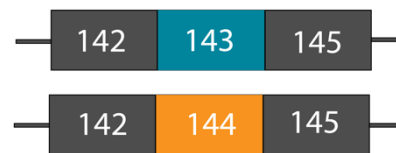

### Patient Gene Model

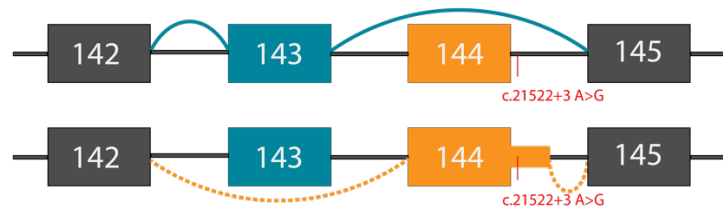

### Patient Isoforms

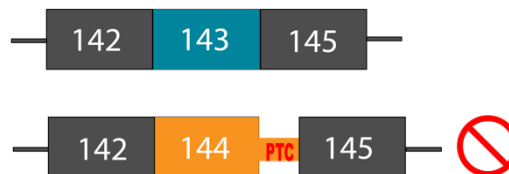

Figure D

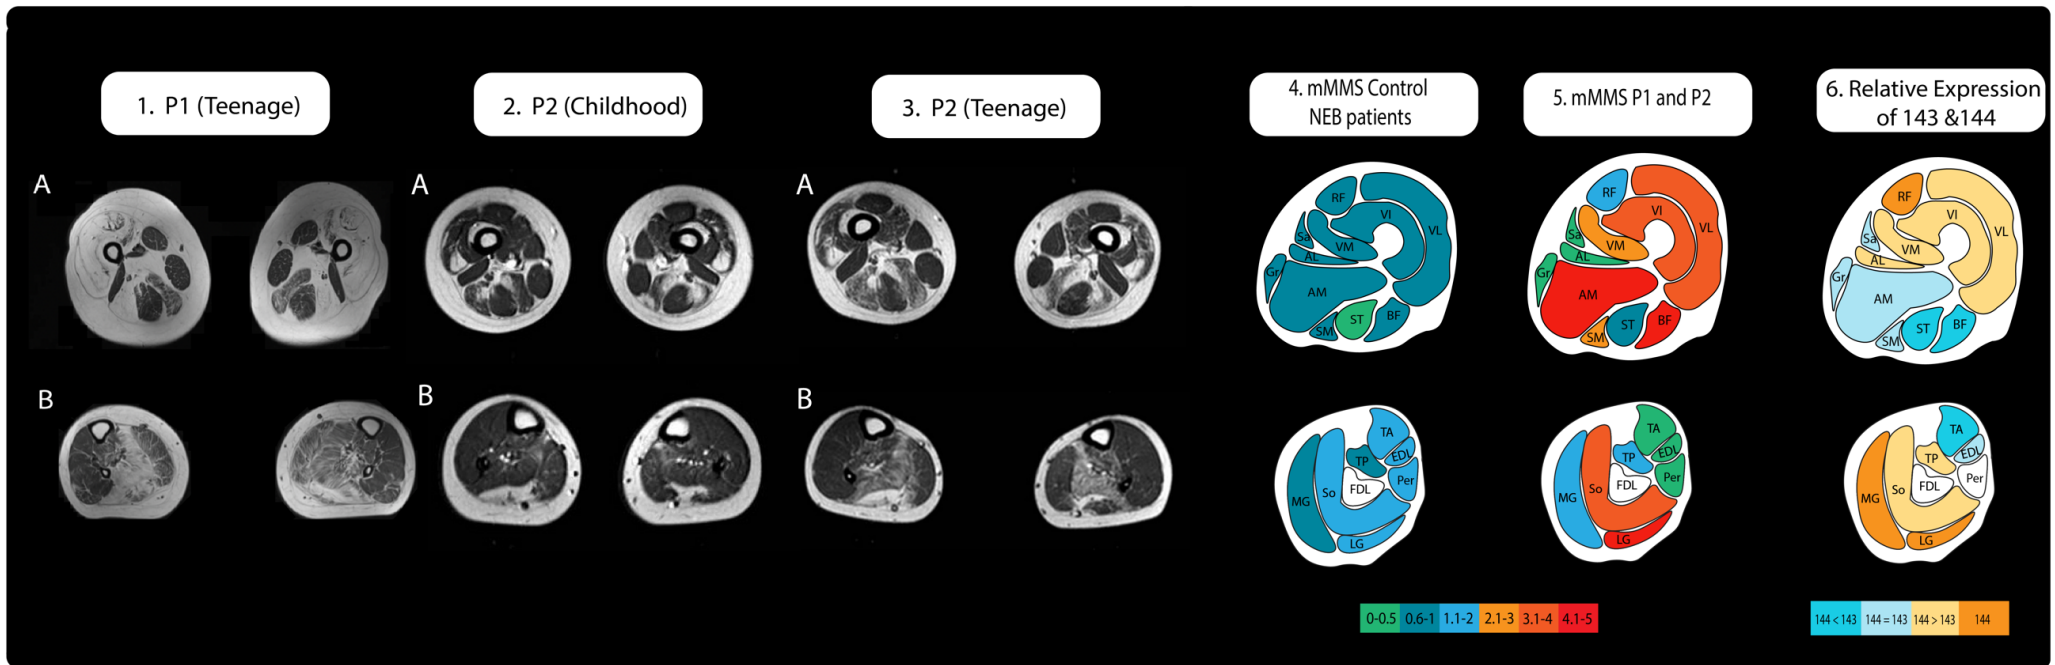

Source: https://medrxiv.org/content/10.1101/2024.03.25.24304535.full.pdf
